# Supplementary material for: Words by the tail: Assessing lexical diversity in scholarly titles using frequency-rank distribution tail fits
Source: PubMed Central journal article supplement (PMC6037356; doi:10.1371/journal.pone.0197775), 2018-07-09

# Biology

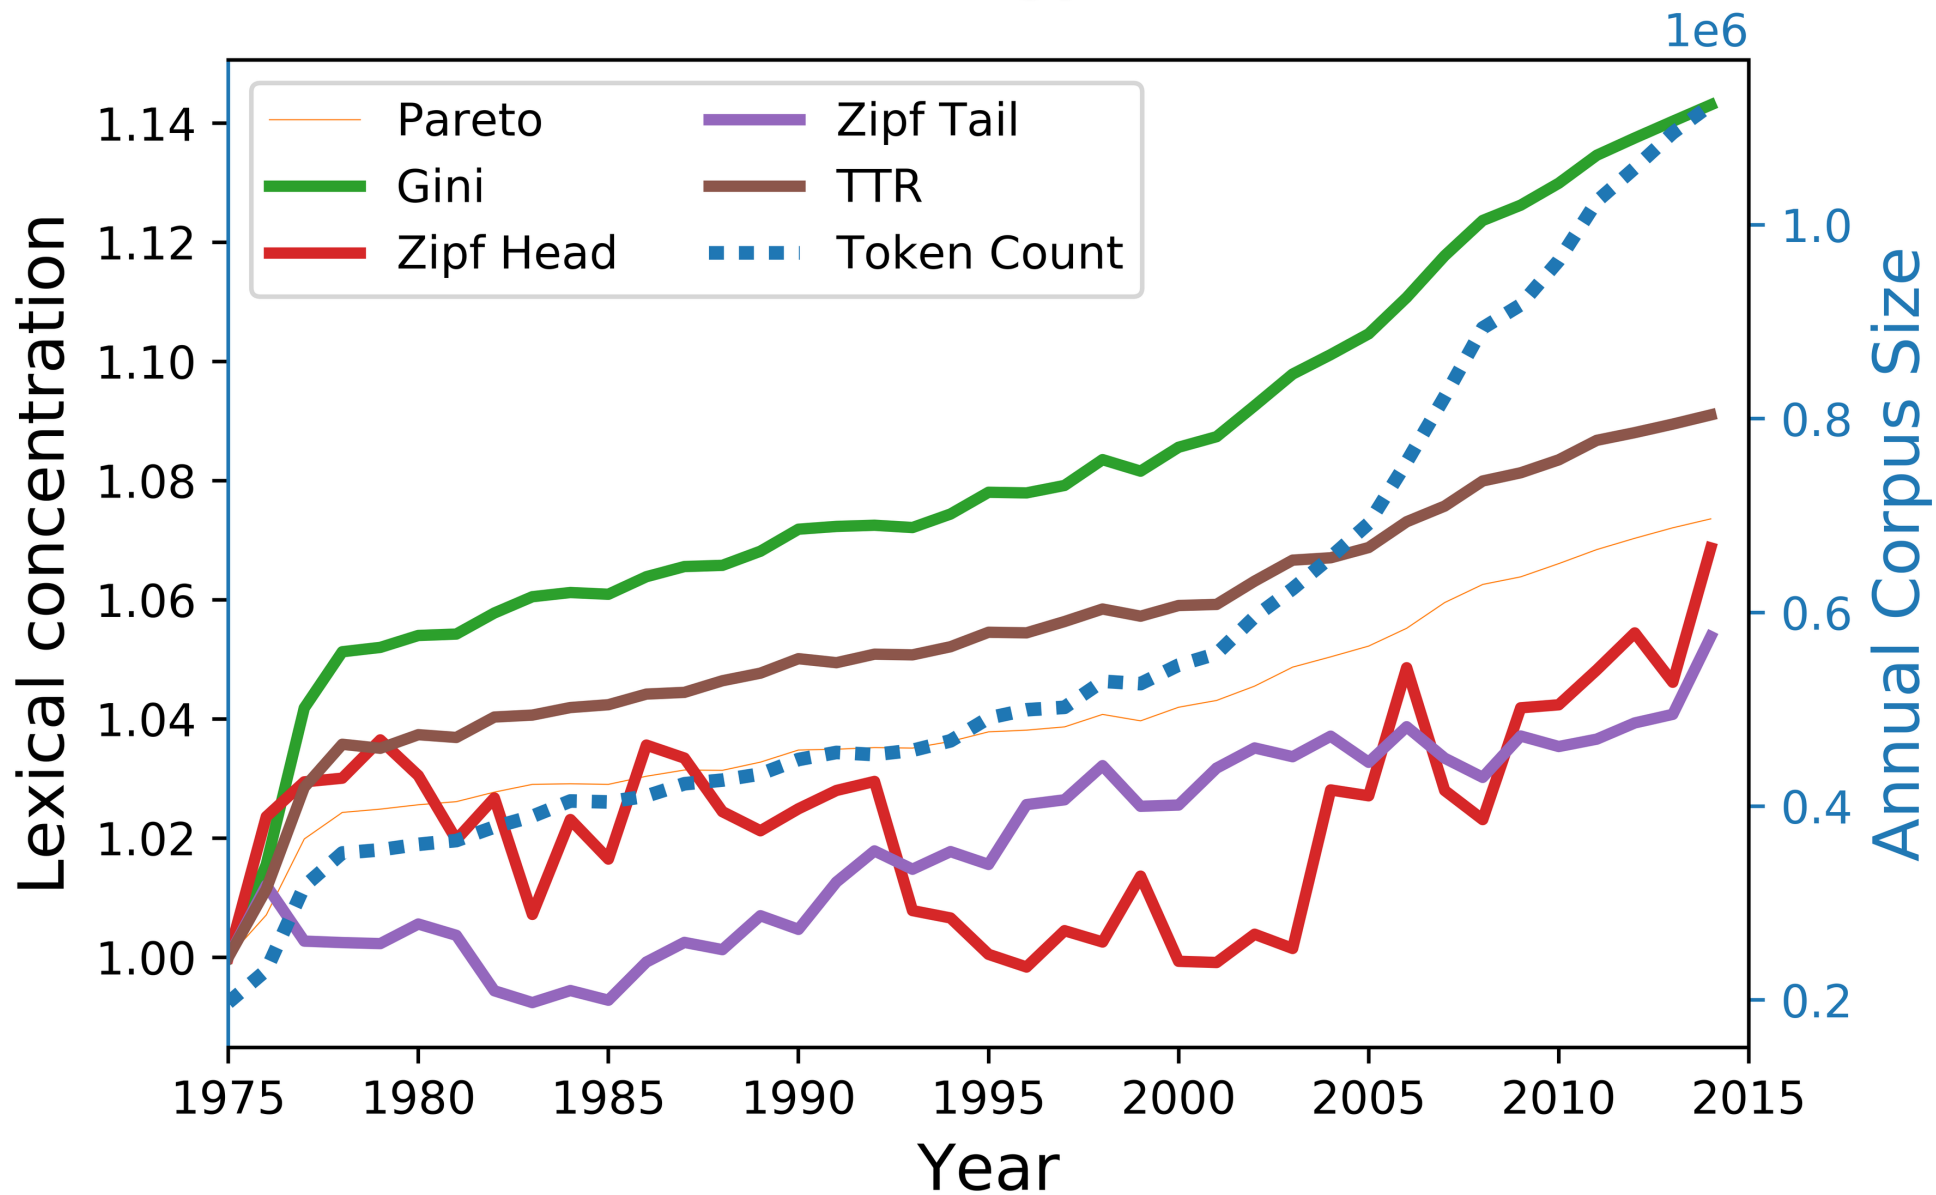

# Biomedical Research

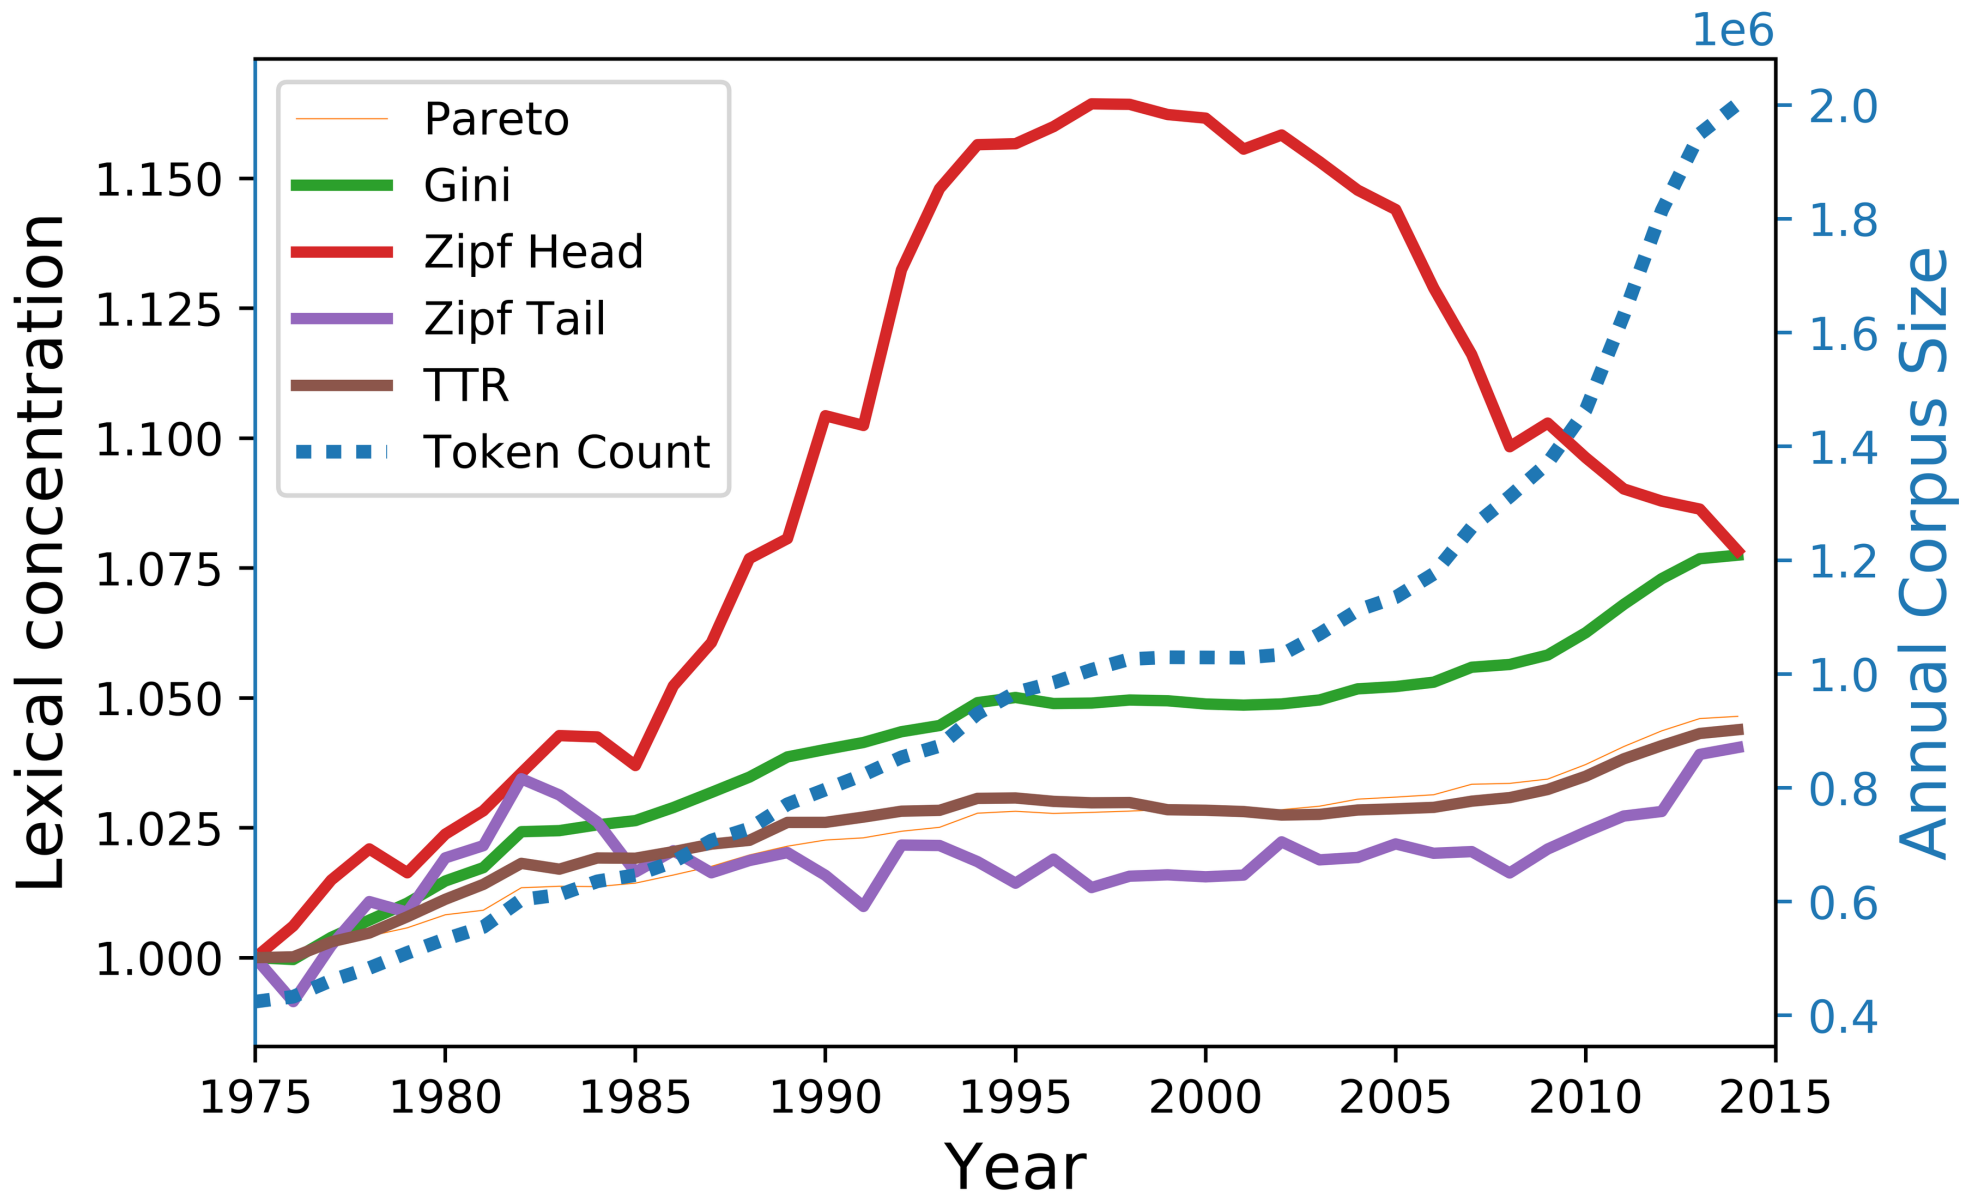

# Chemistry

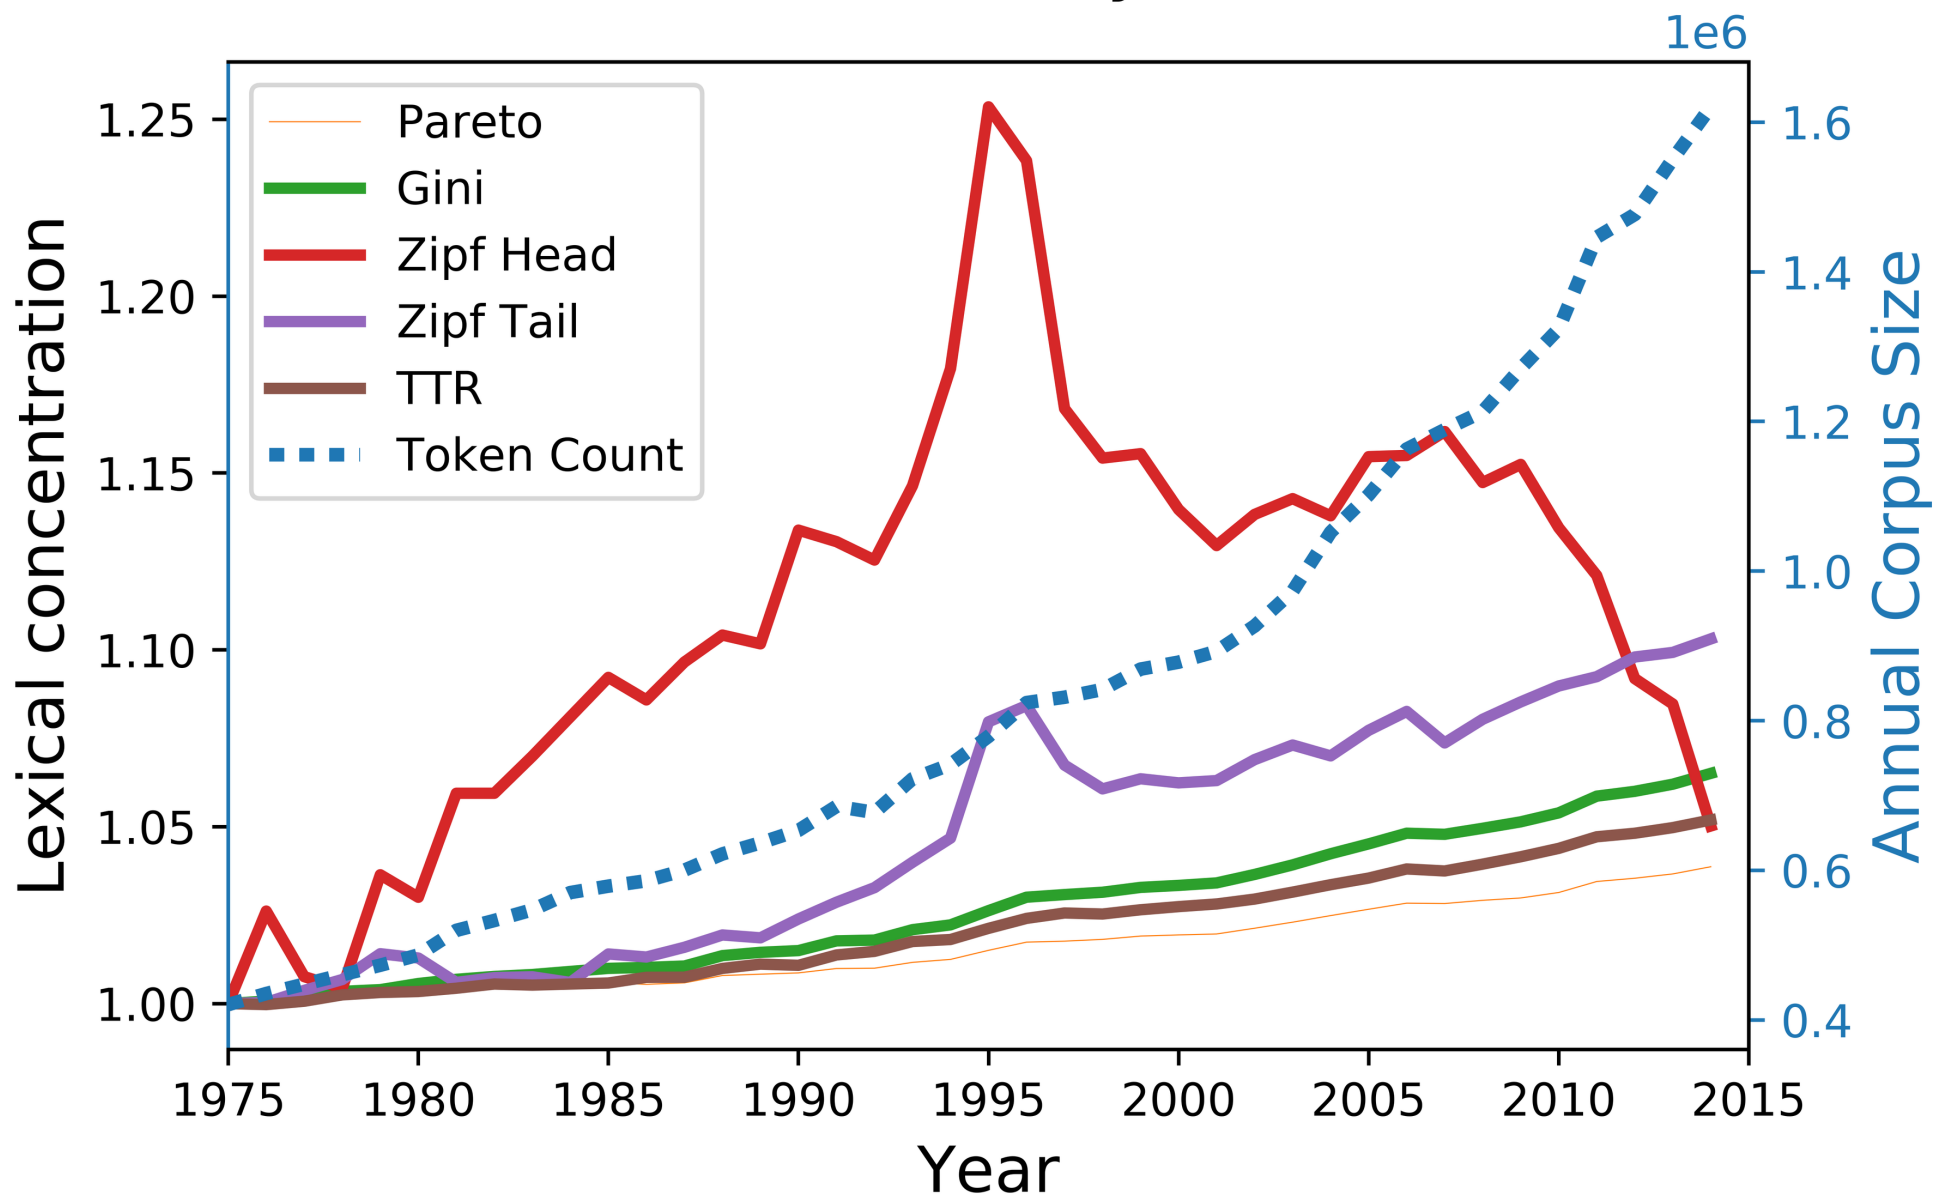

# Clinical Medicine

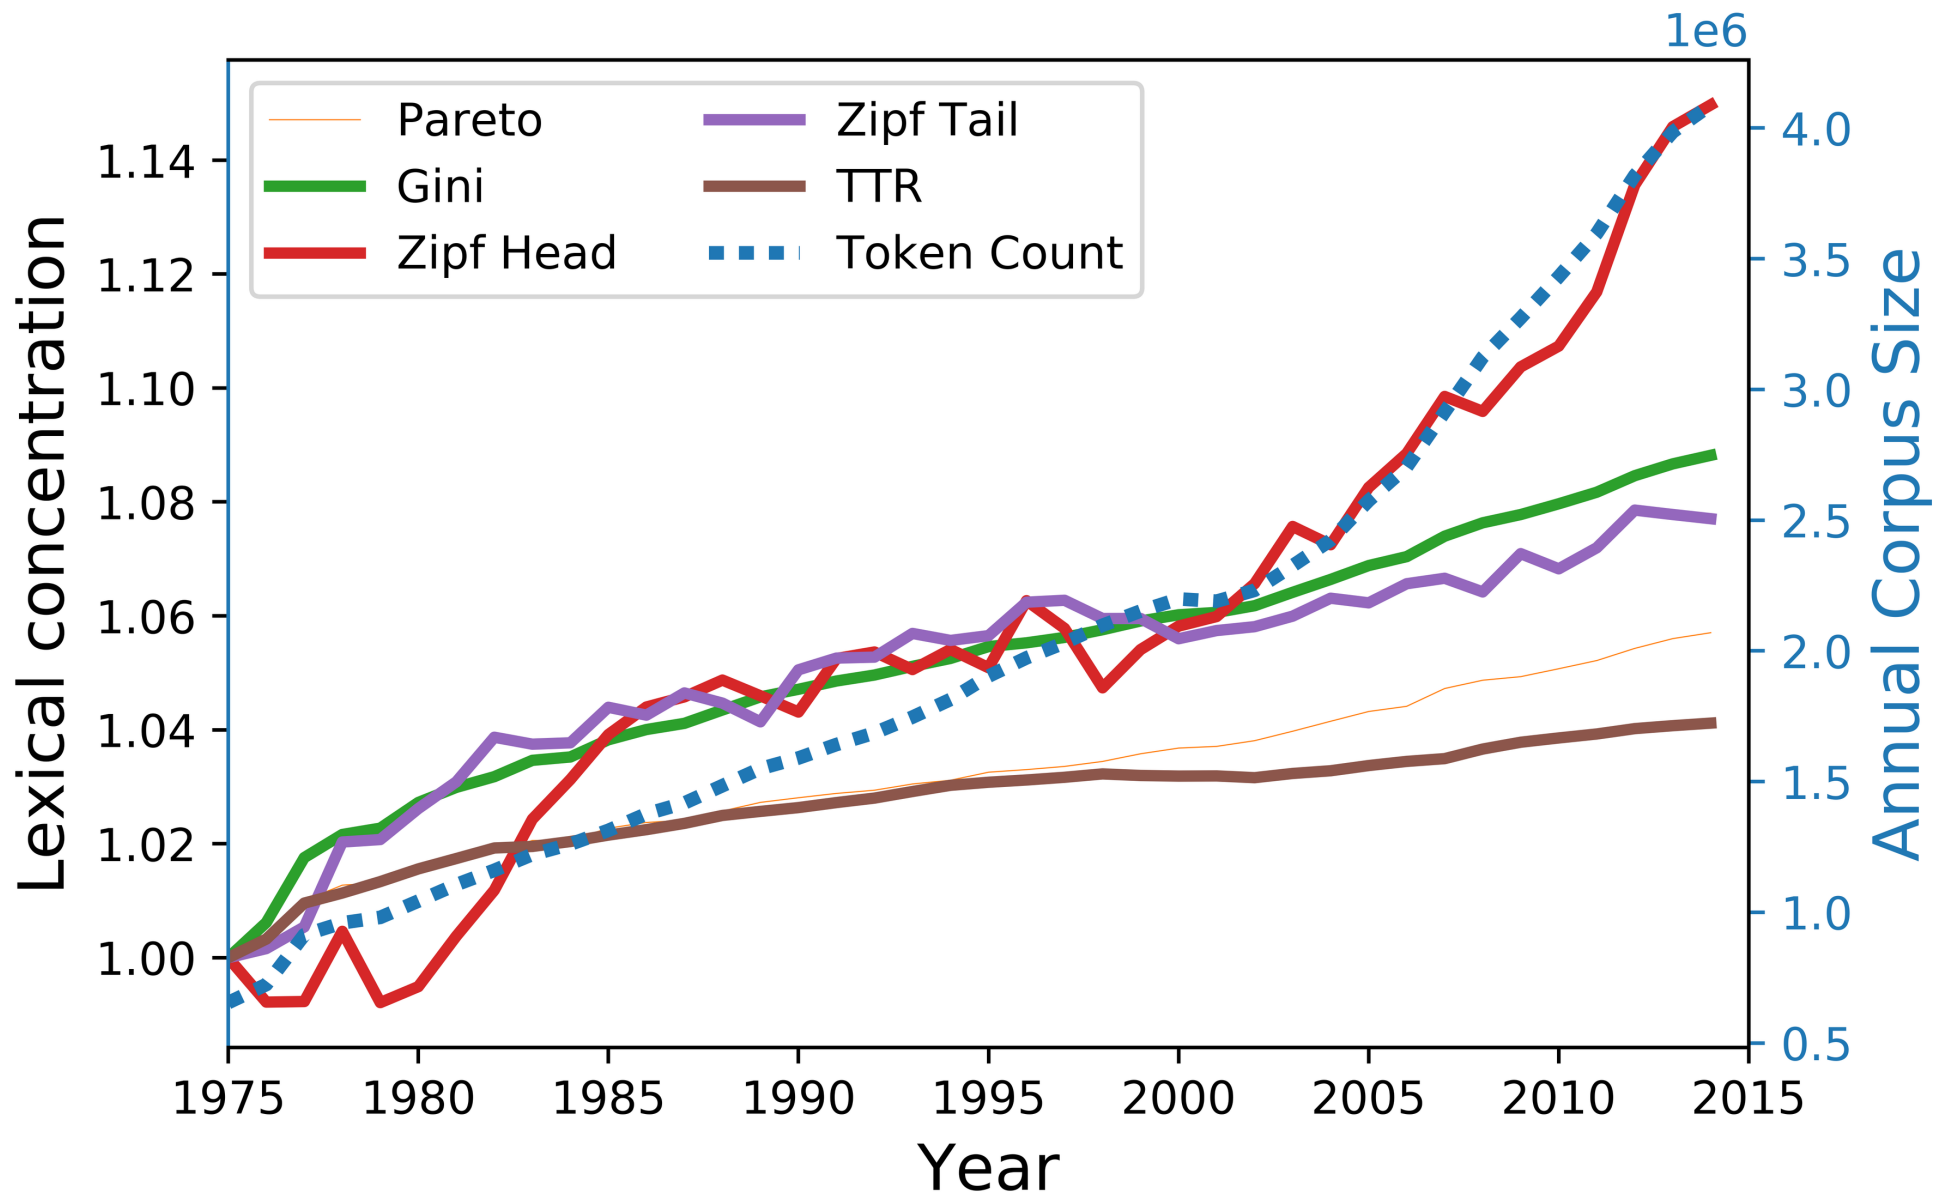

# Earth and Space

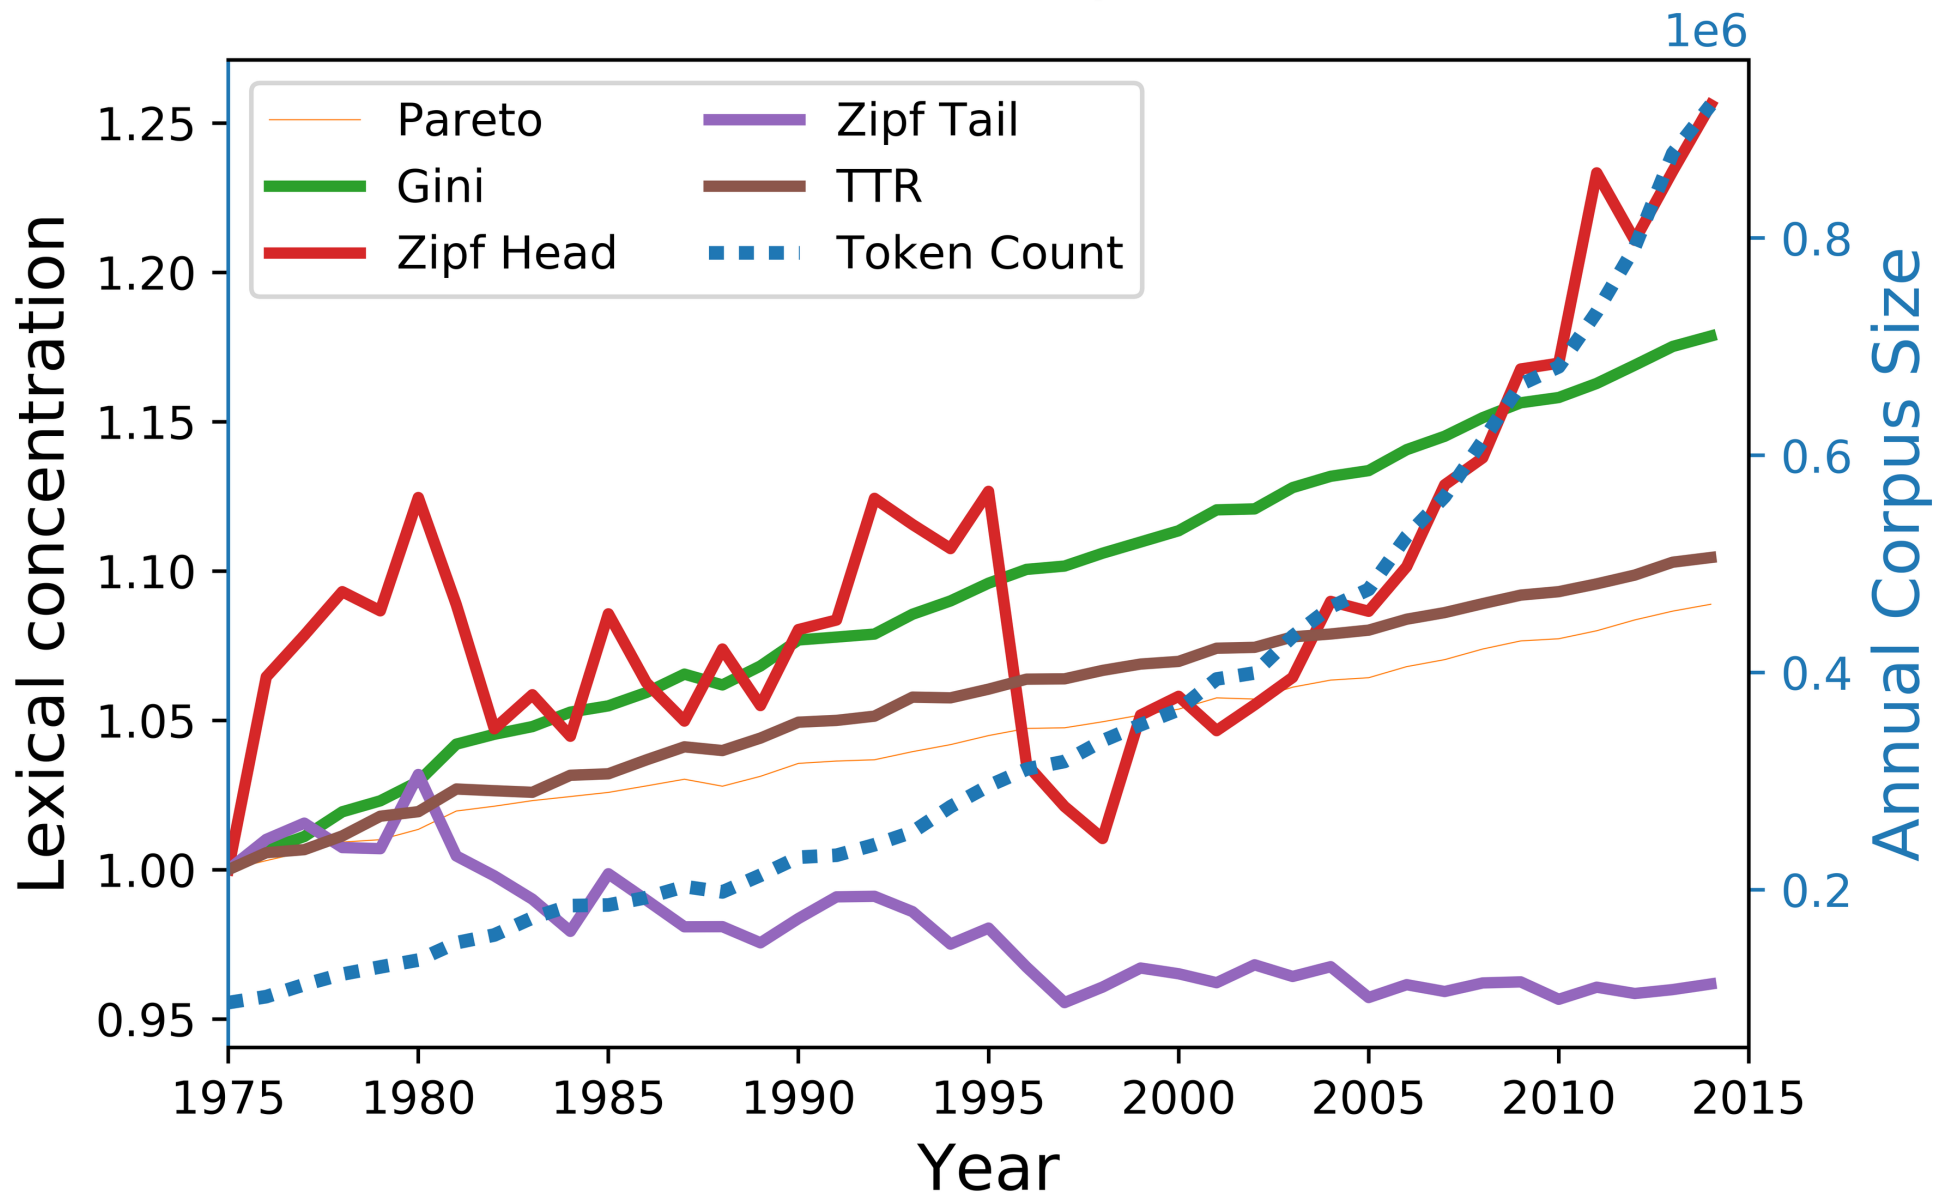

# Engineering and Technology

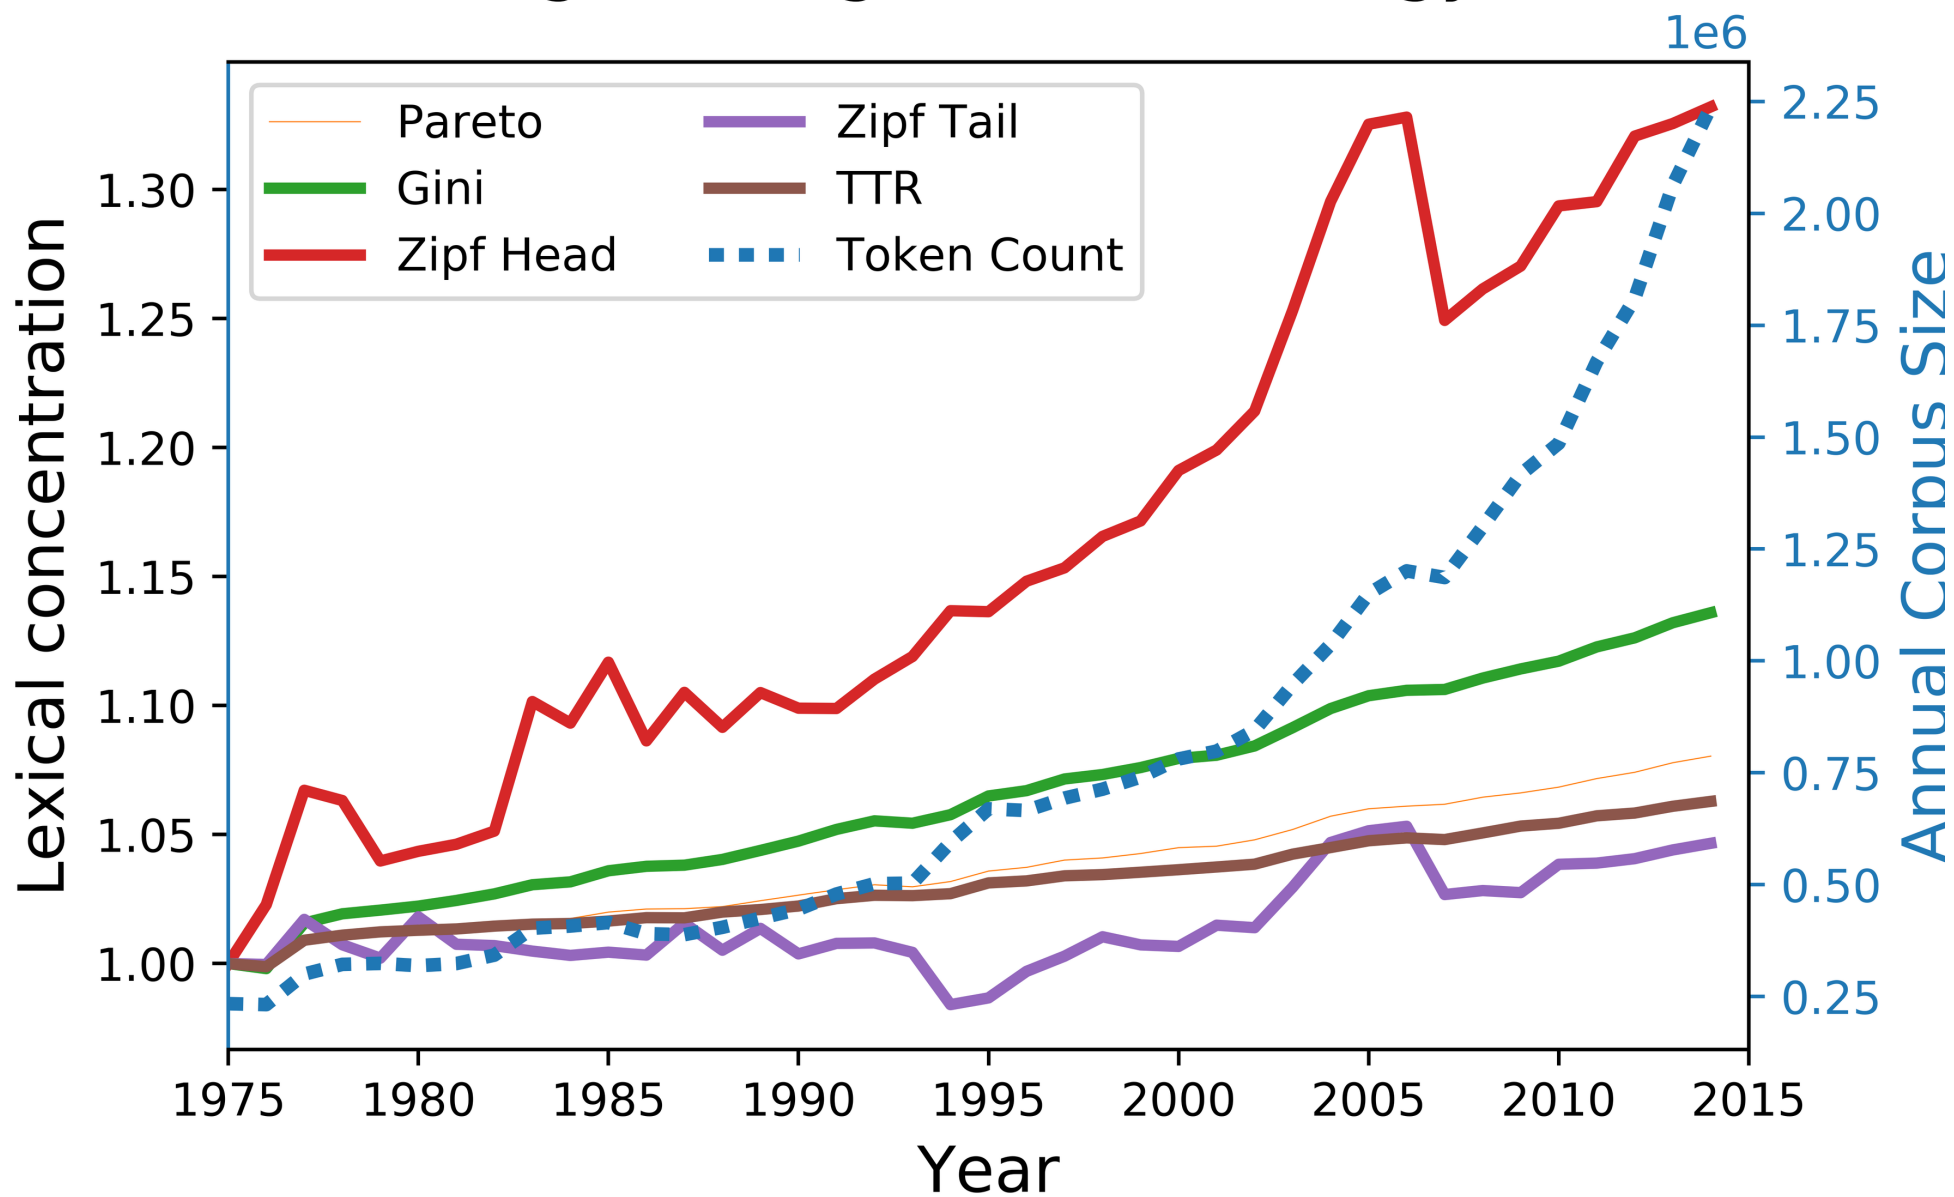

# Mathematics

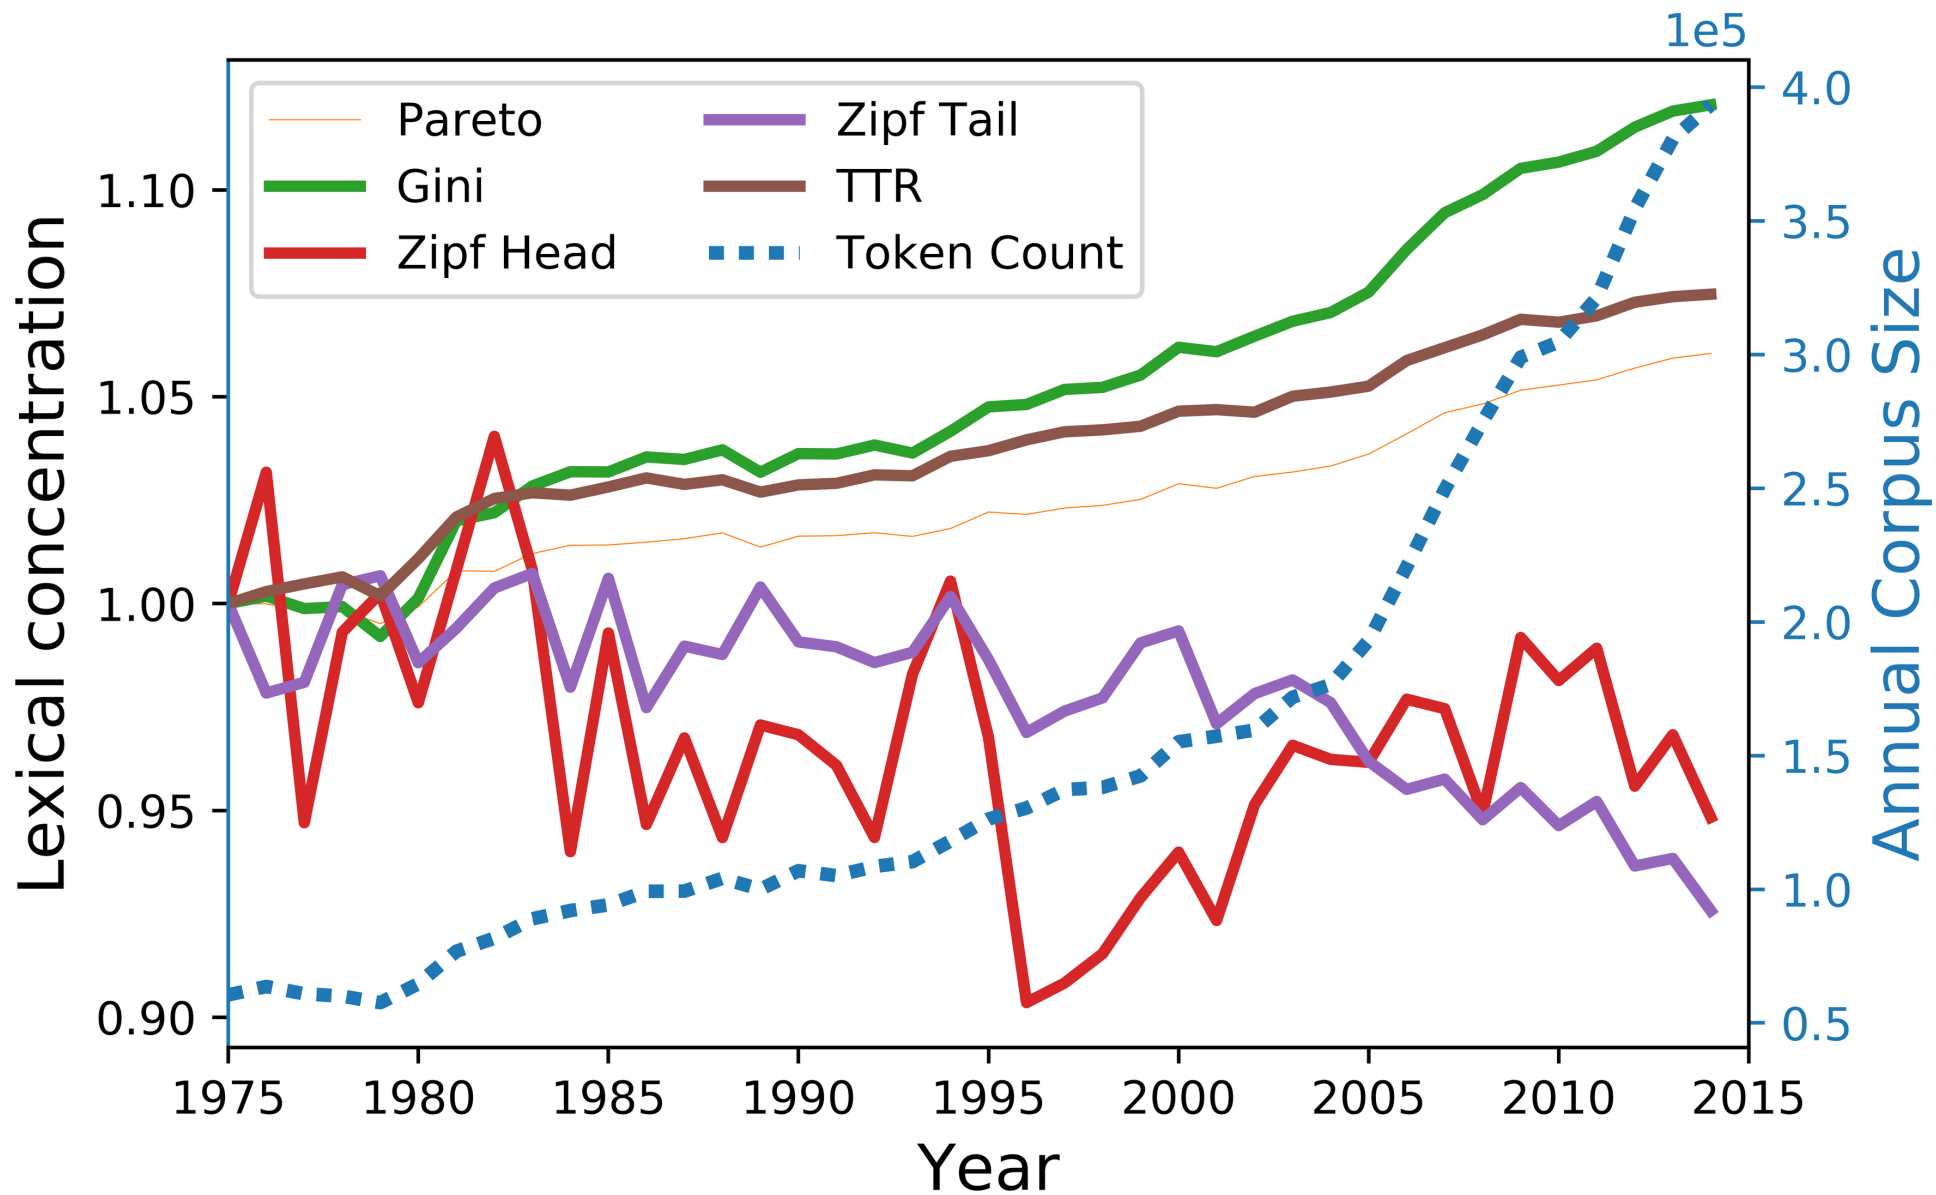

# Physics

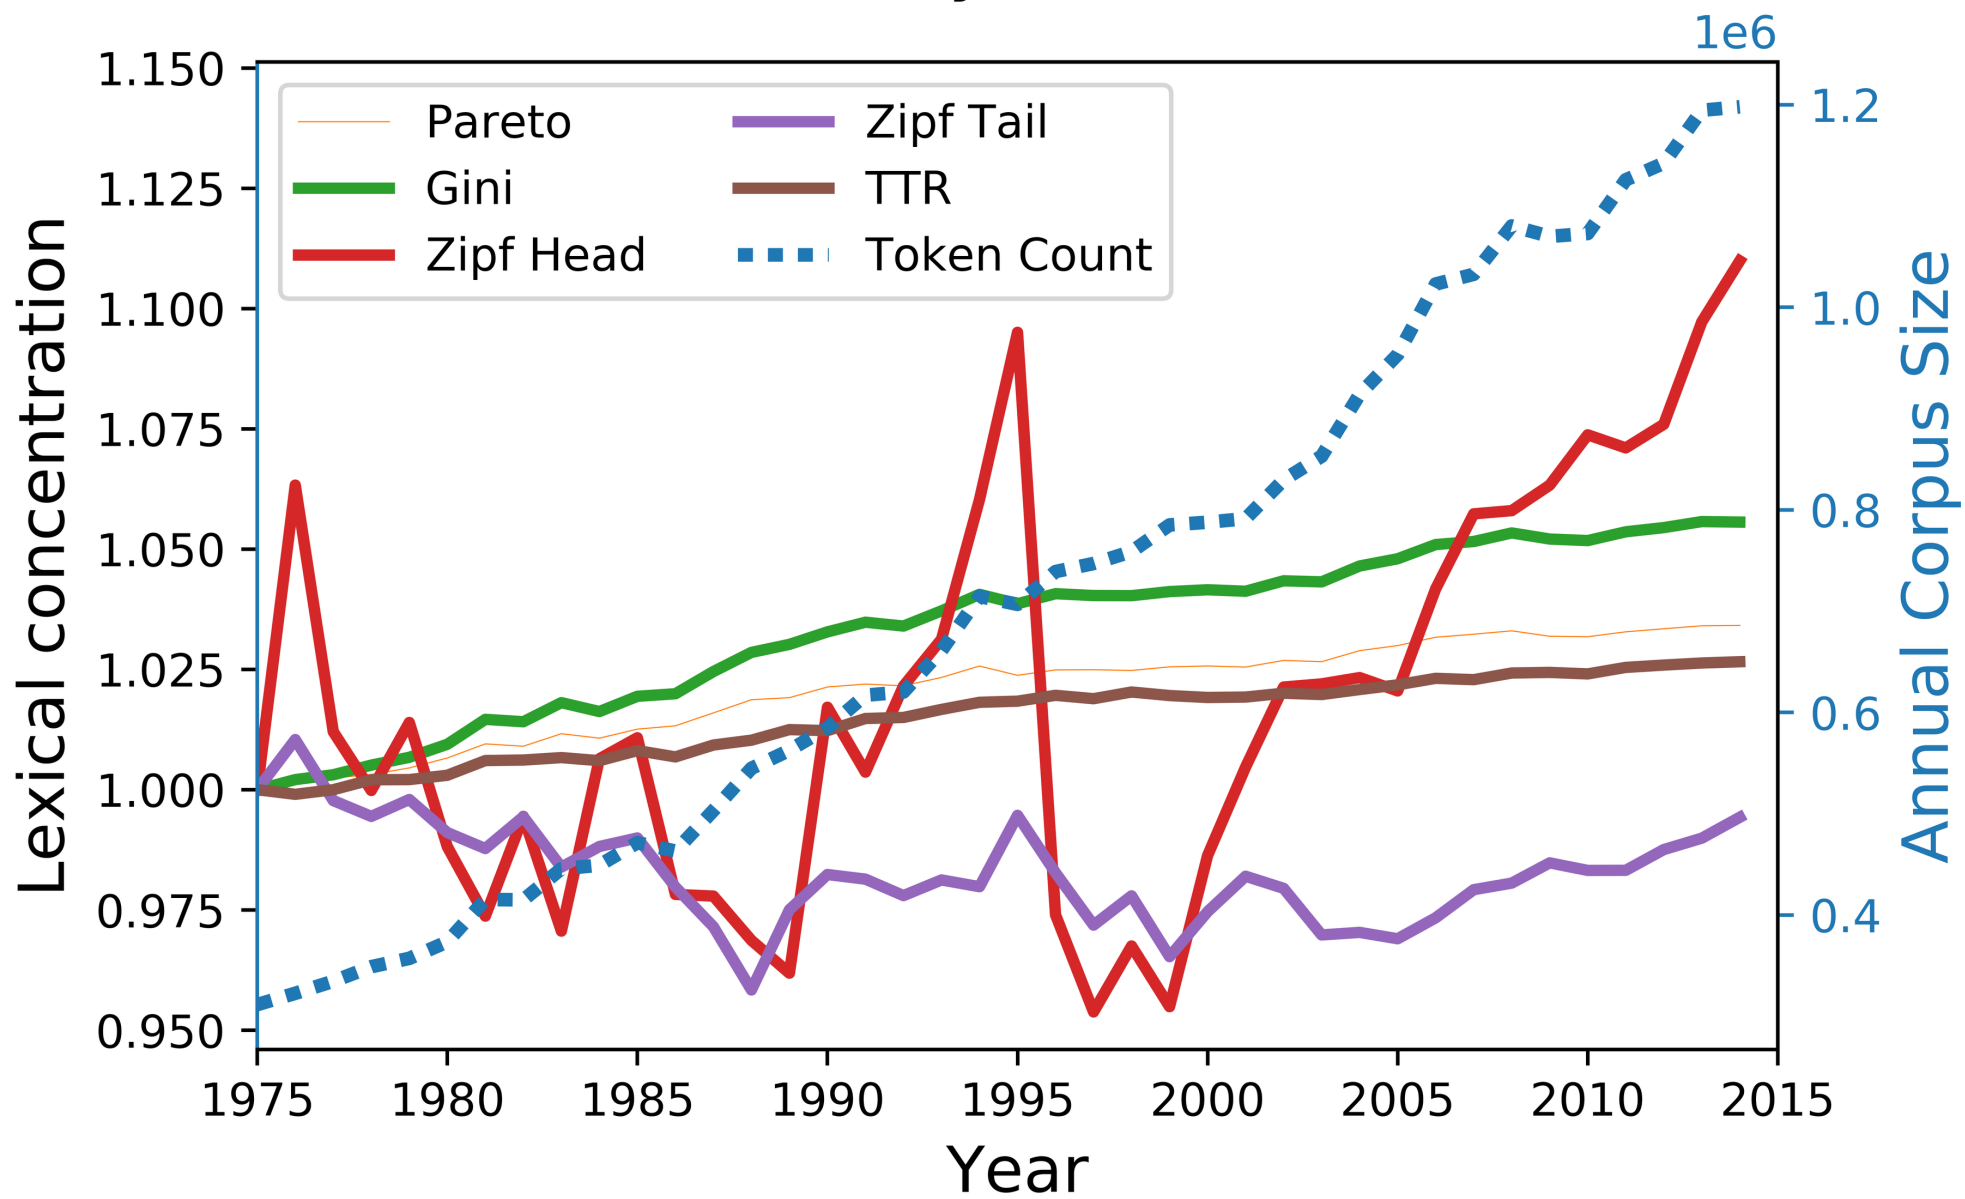

Supplement: pone.0197775.s003.pdf [file pone.0197775.s003.pdf]
