# Supplementary material for: Words by the tail: Assessing lexical diversity in scholarly titles using frequency-rank distribution tail fits
Source: PubMed Central journal article supplement (PMC6037356; doi:10.1371/journal.pone.0197775), 2018-07-09

# Health

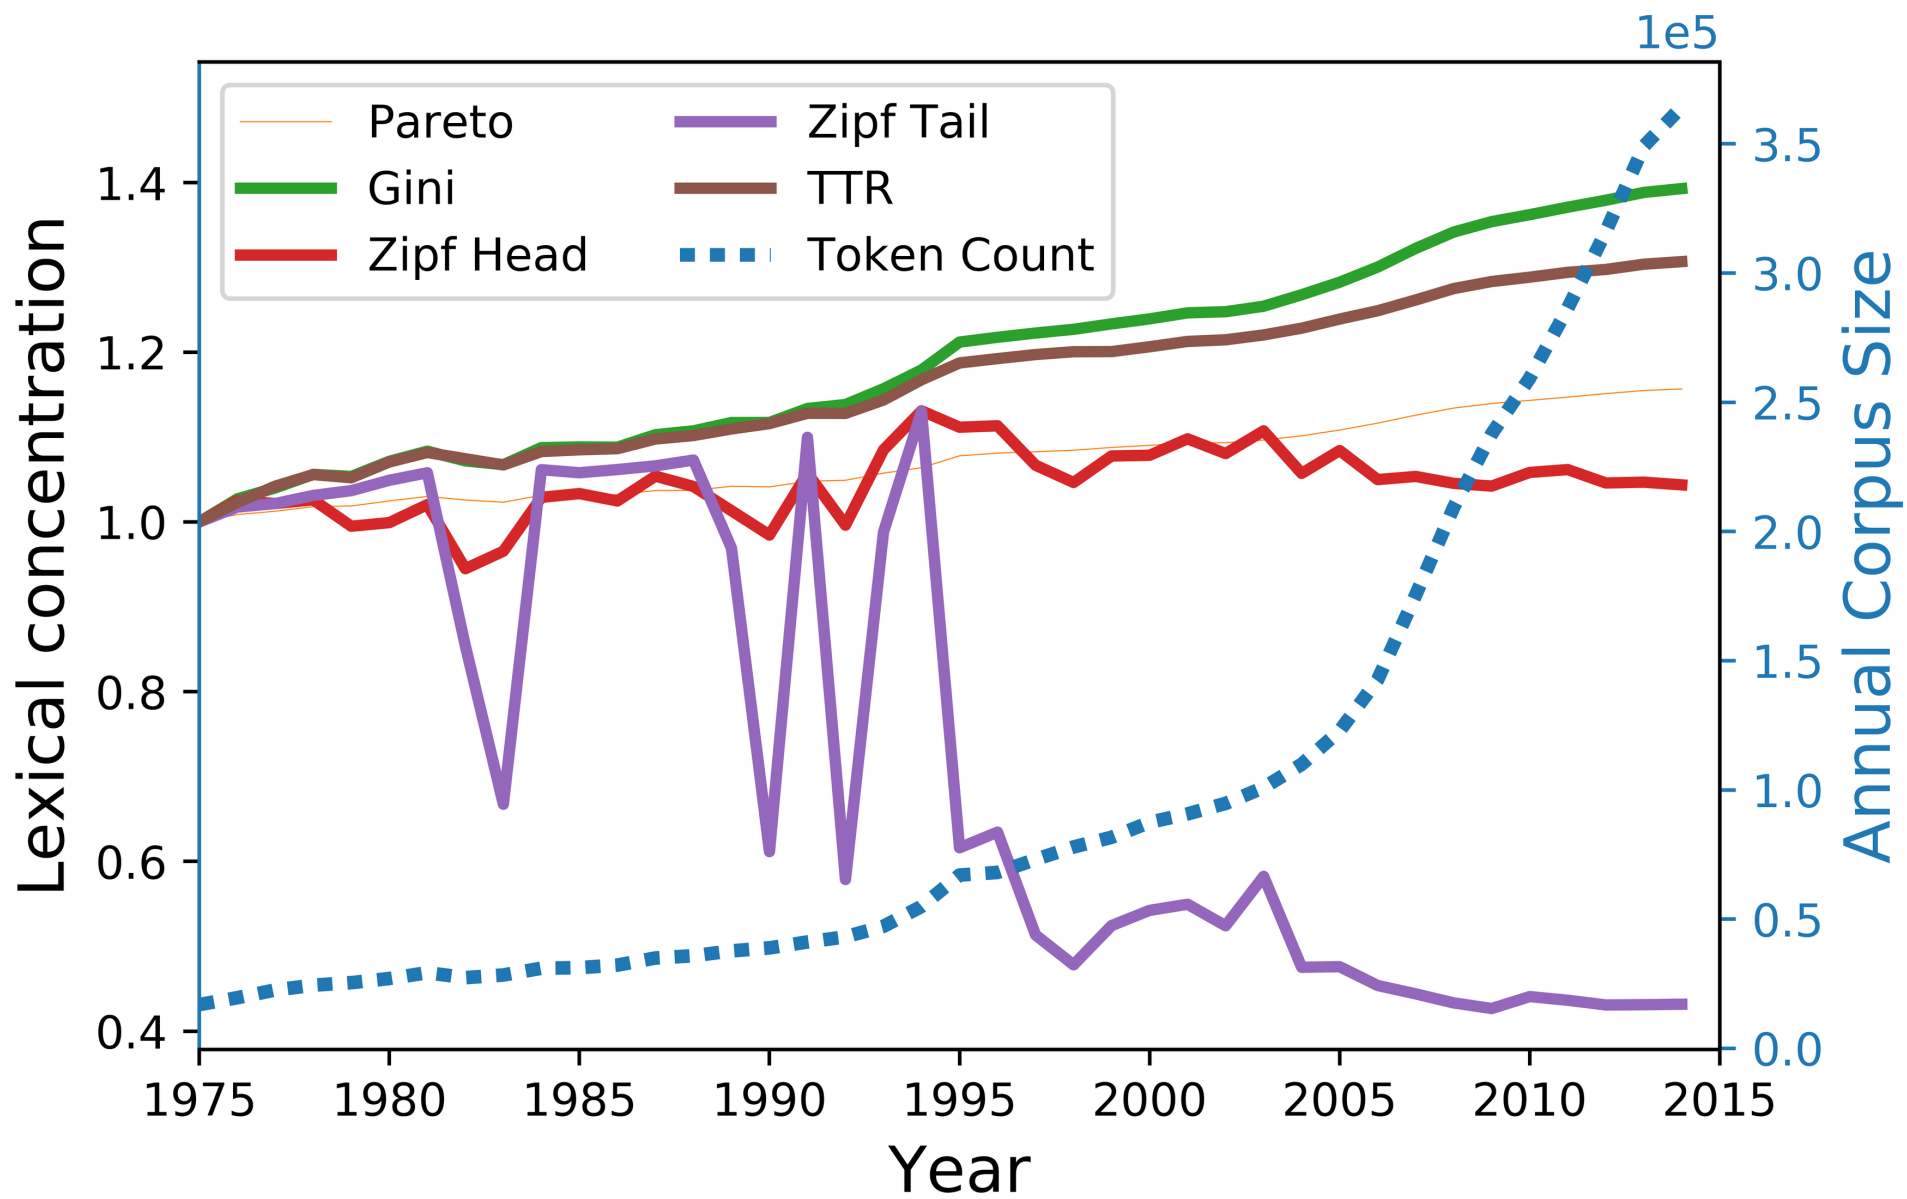

# Humanities

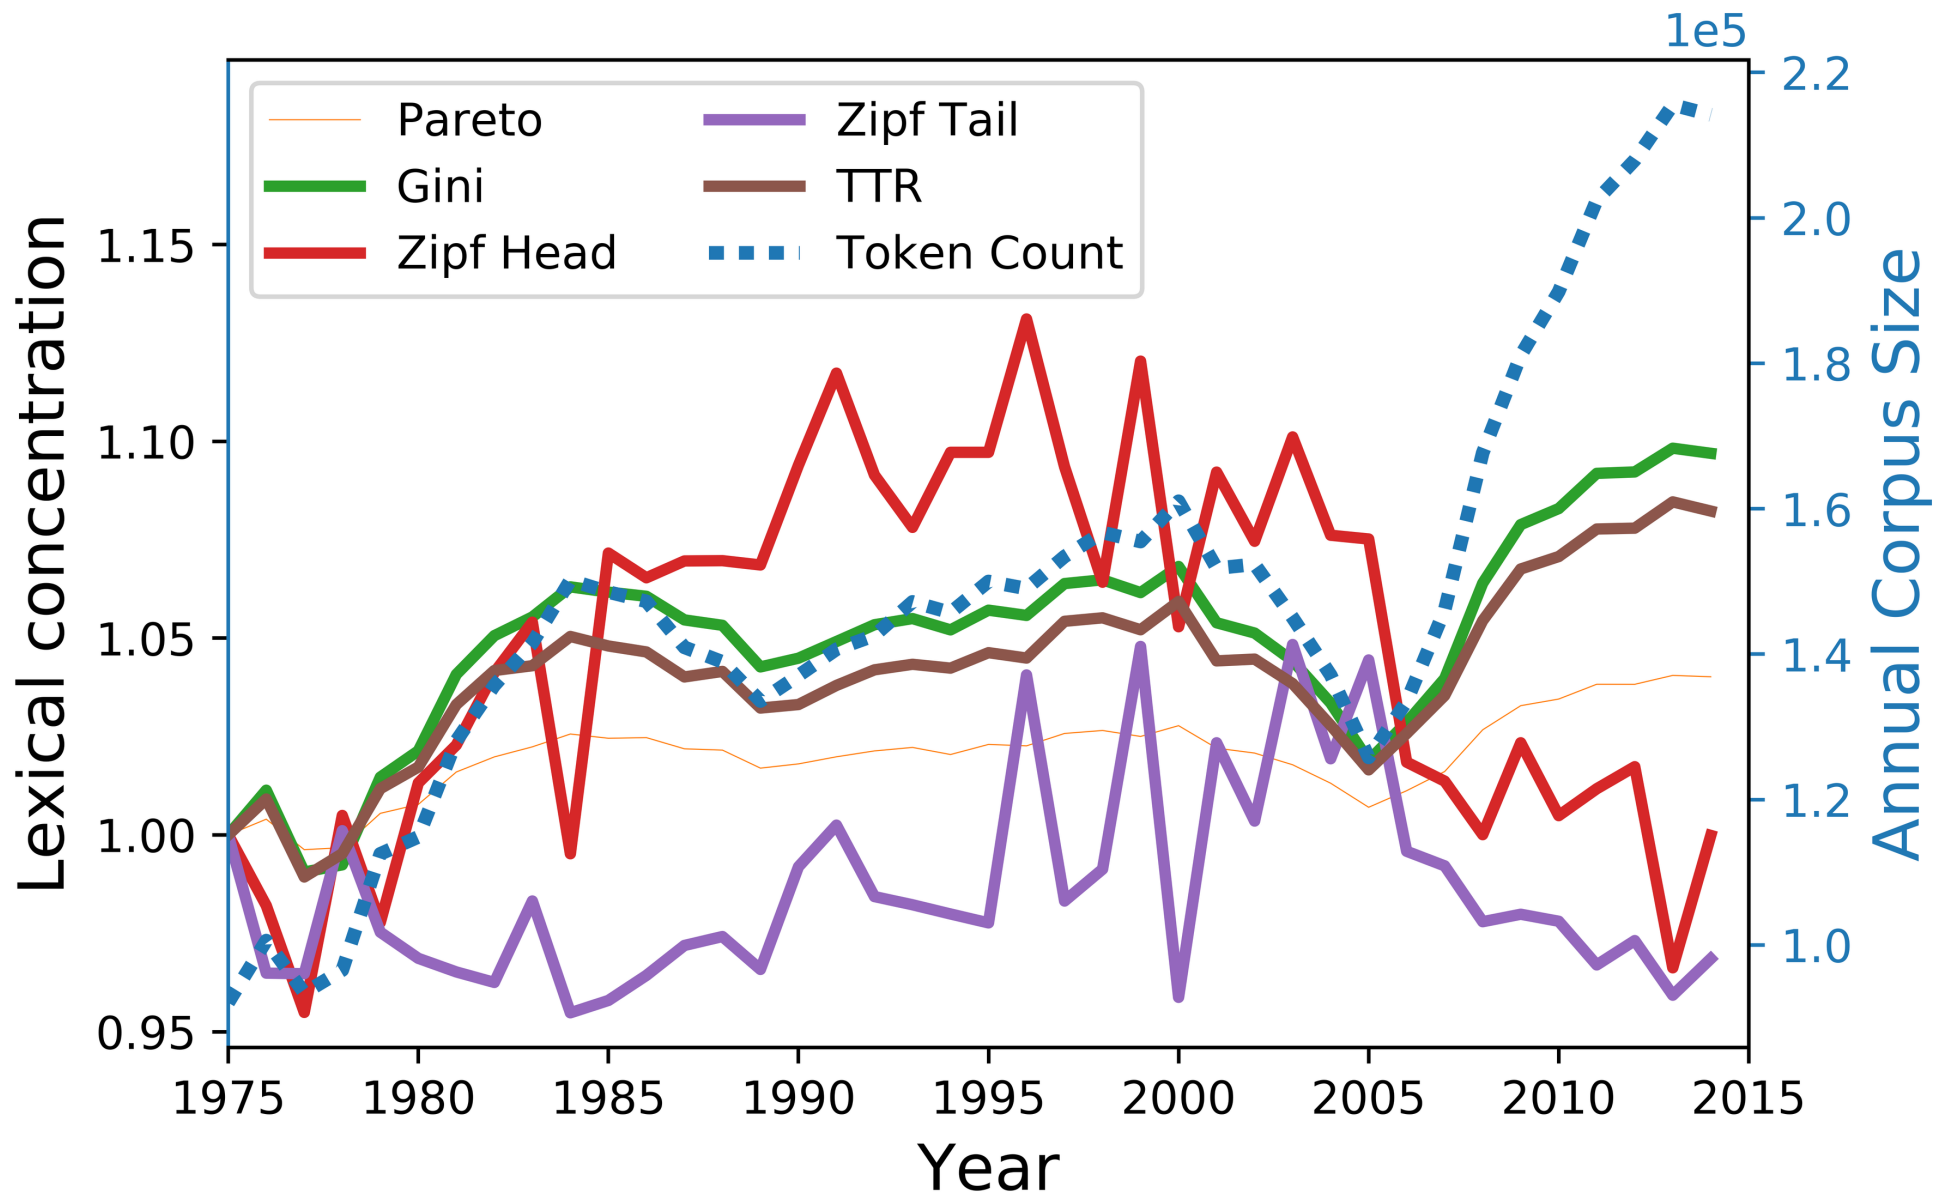

# Professional Fields

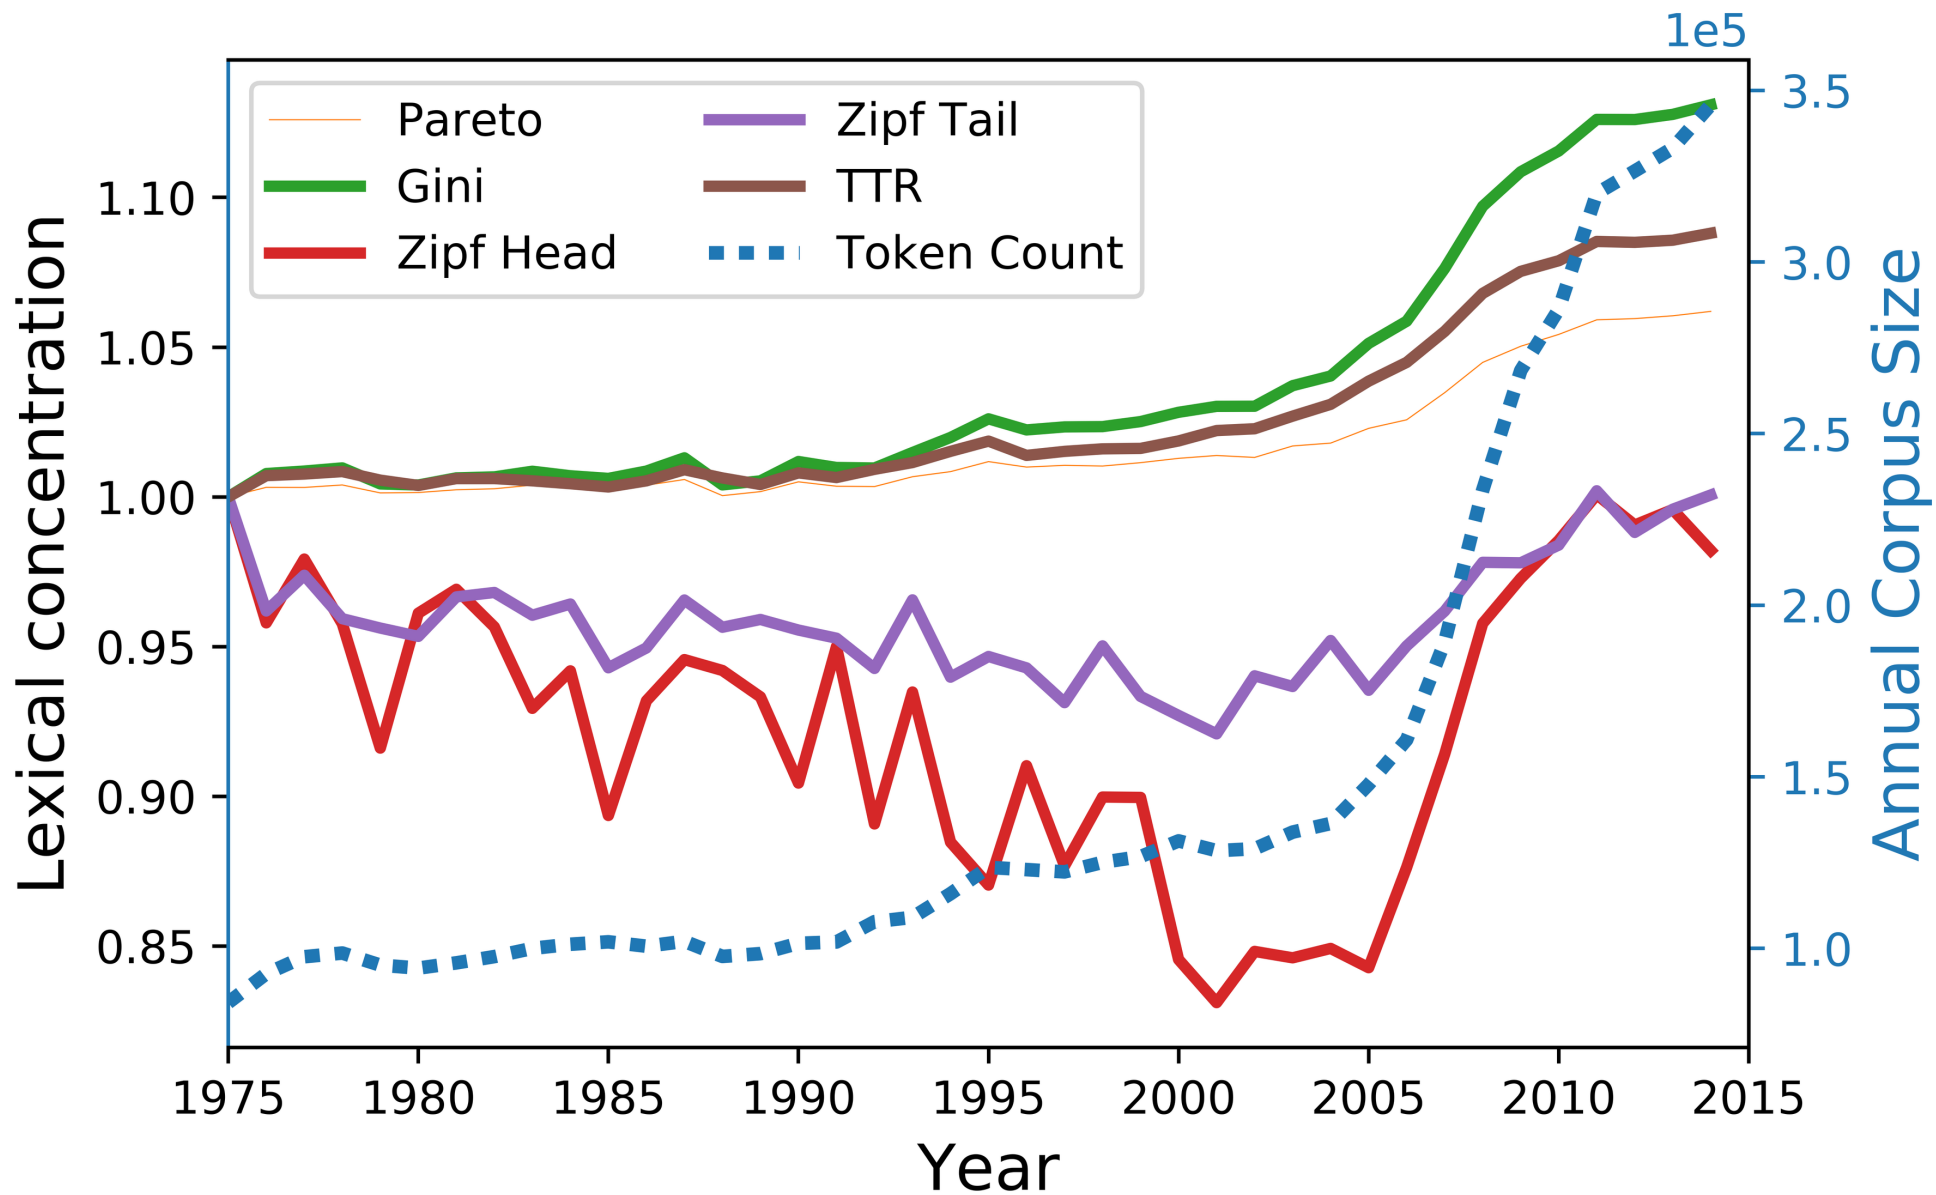

# Psychology

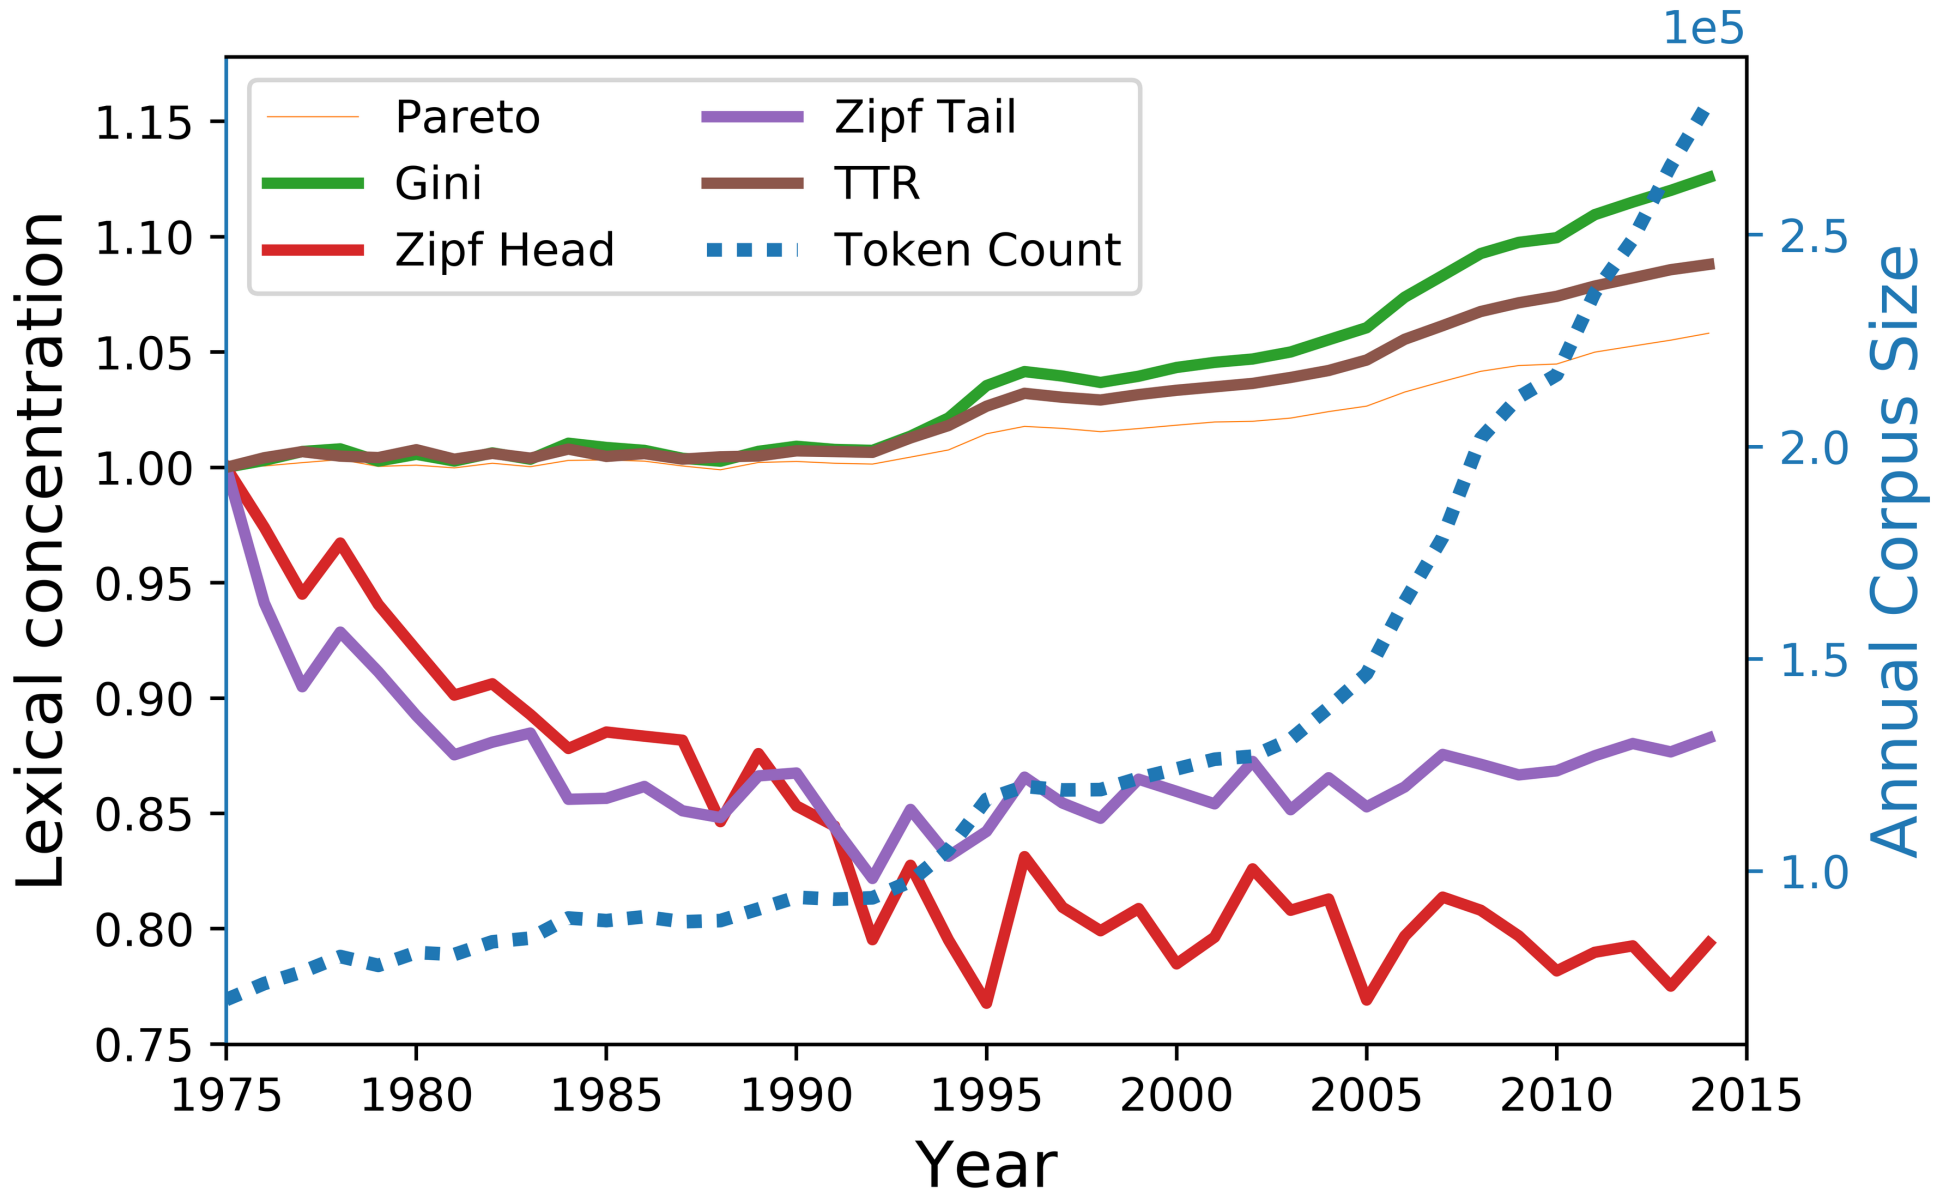

# Social Sciences

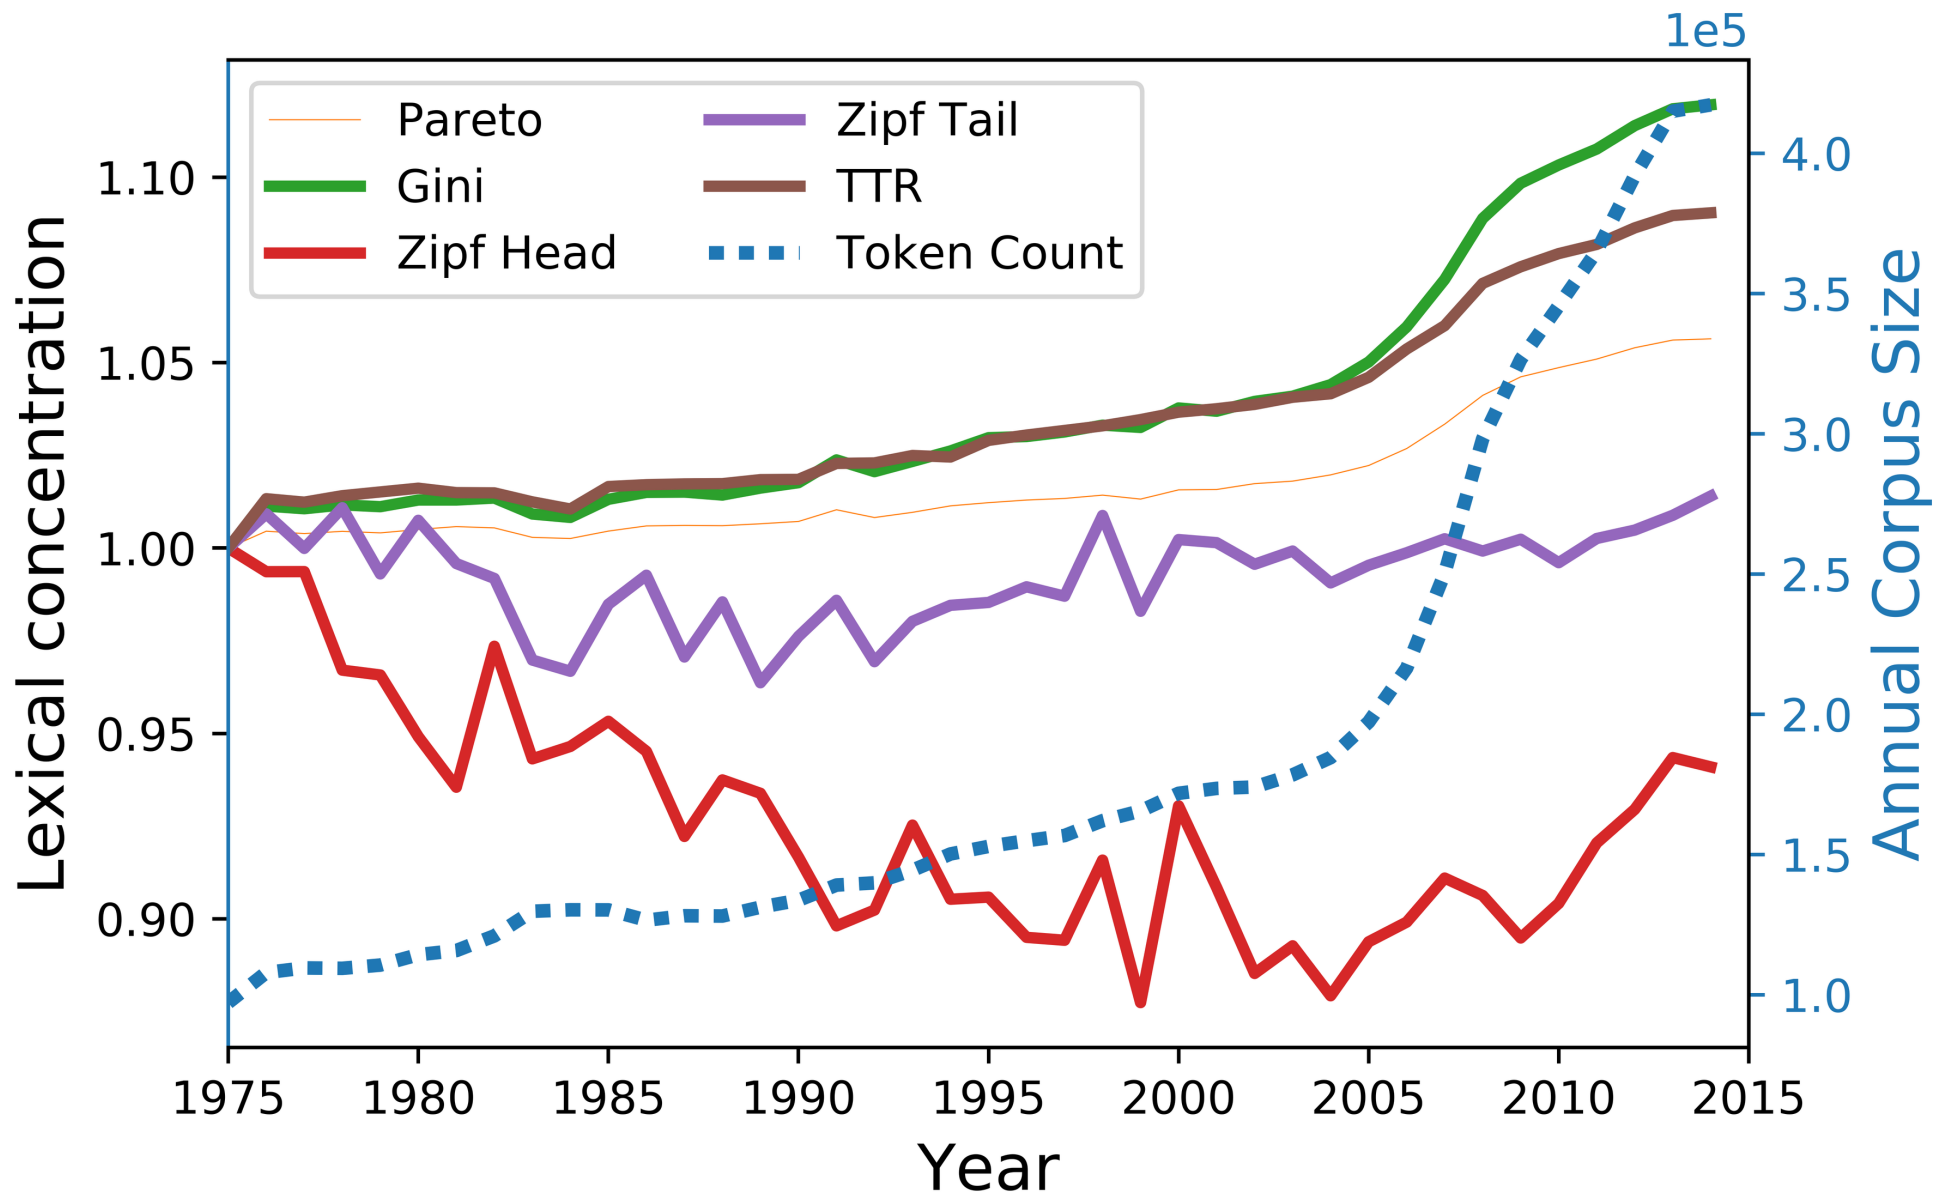

Supplement: pone.0197775.s004.pdf [file pone.0197775.s004.pdf]
